# Supplementary material for: Effects of varying water adsorption on a Cu3(BTC)2 metal–organic framework (MOF) as studied by 1H and 13C solid-state NMR spectroscopy
Source: Royal Society of Chemistry journal article supplement (doi:10.1039/c0cp02848g), 2011-01-01
Supplement: c0cp02848g.pdf [file c0cp02848g.pdf]

## Supporting Information

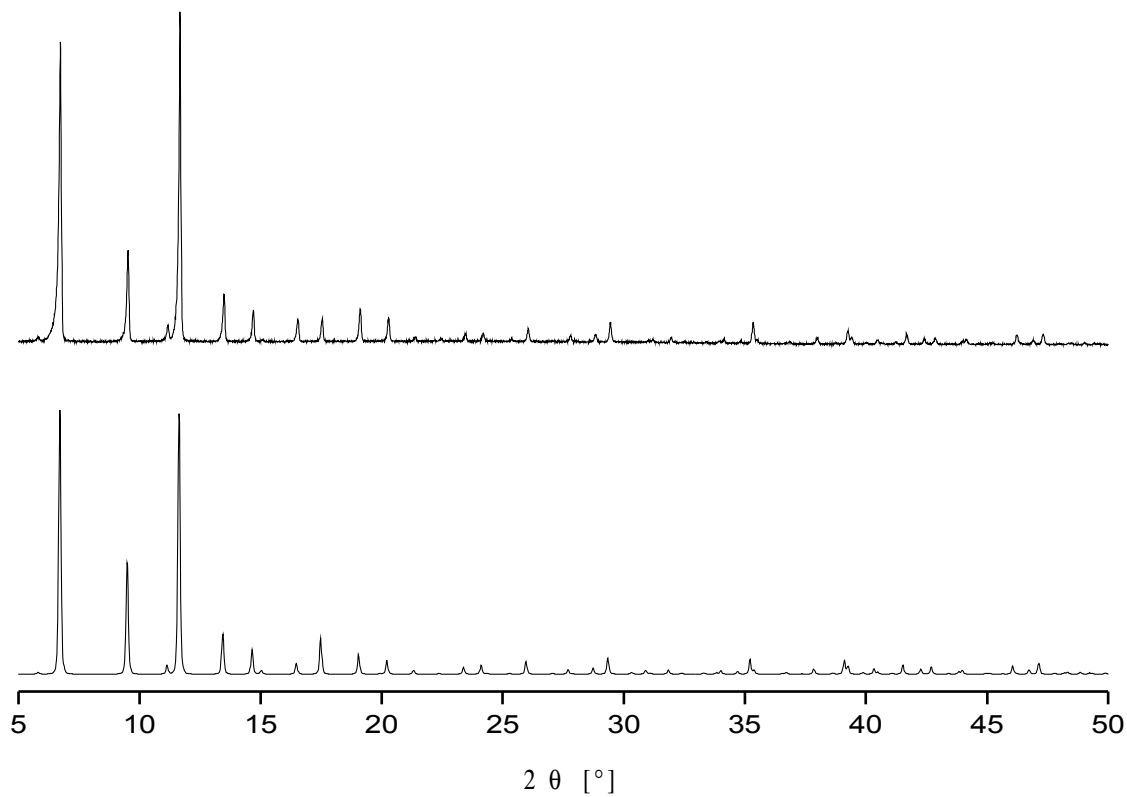

**Figure S-1:** XRD powder pattern of  $\text{Cu}_3(\text{BTC})_2$  (top), and calculated pattern from single crystal X-ray data of  $\text{Cu}_3(\text{BTC})_2$  (bottom) at 293 K.

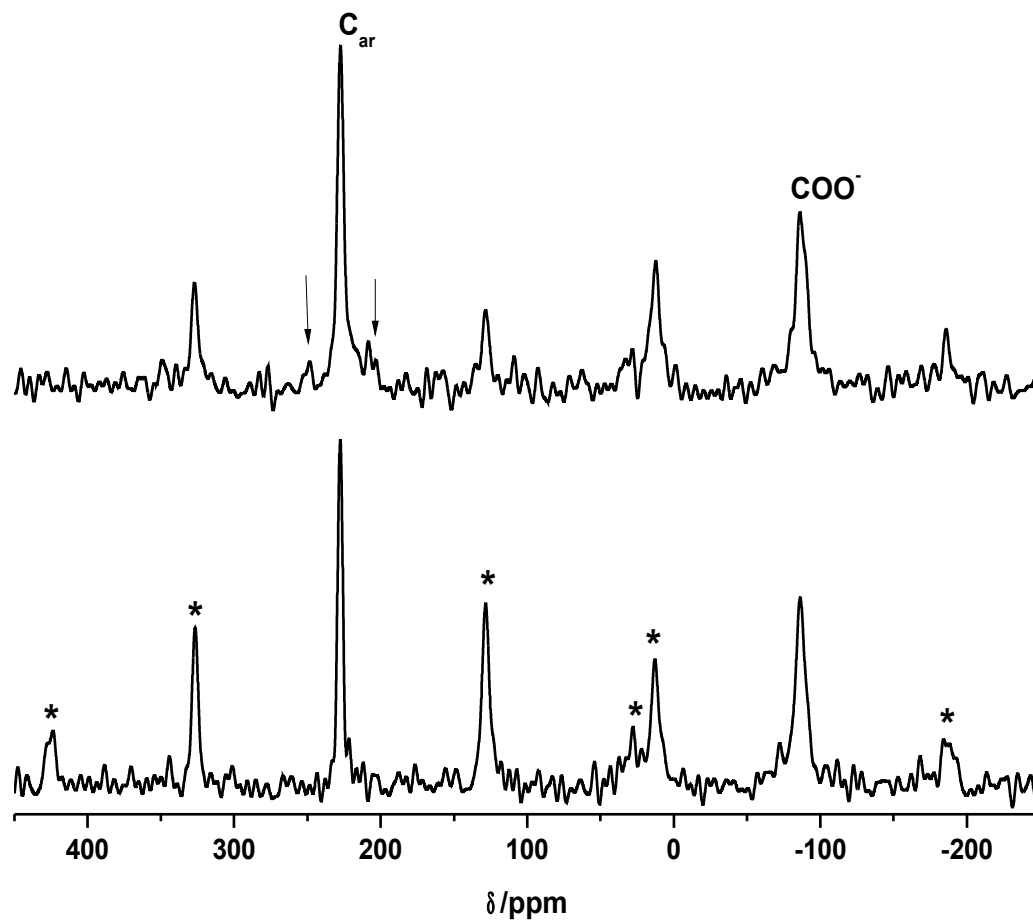

**Figure S-2:**  $^{13}\text{C}$  DPMAS spectra of dehydrated  $\text{Cu}_3(\text{BTC})_2$  with (top) and without (bottom) high-power proton decoupling. Additional signals indicated by arrows are only visible with  $^1\text{H}$  decoupling. Asterisks (shown only in the lower spectrum) denote spinning sidebands.

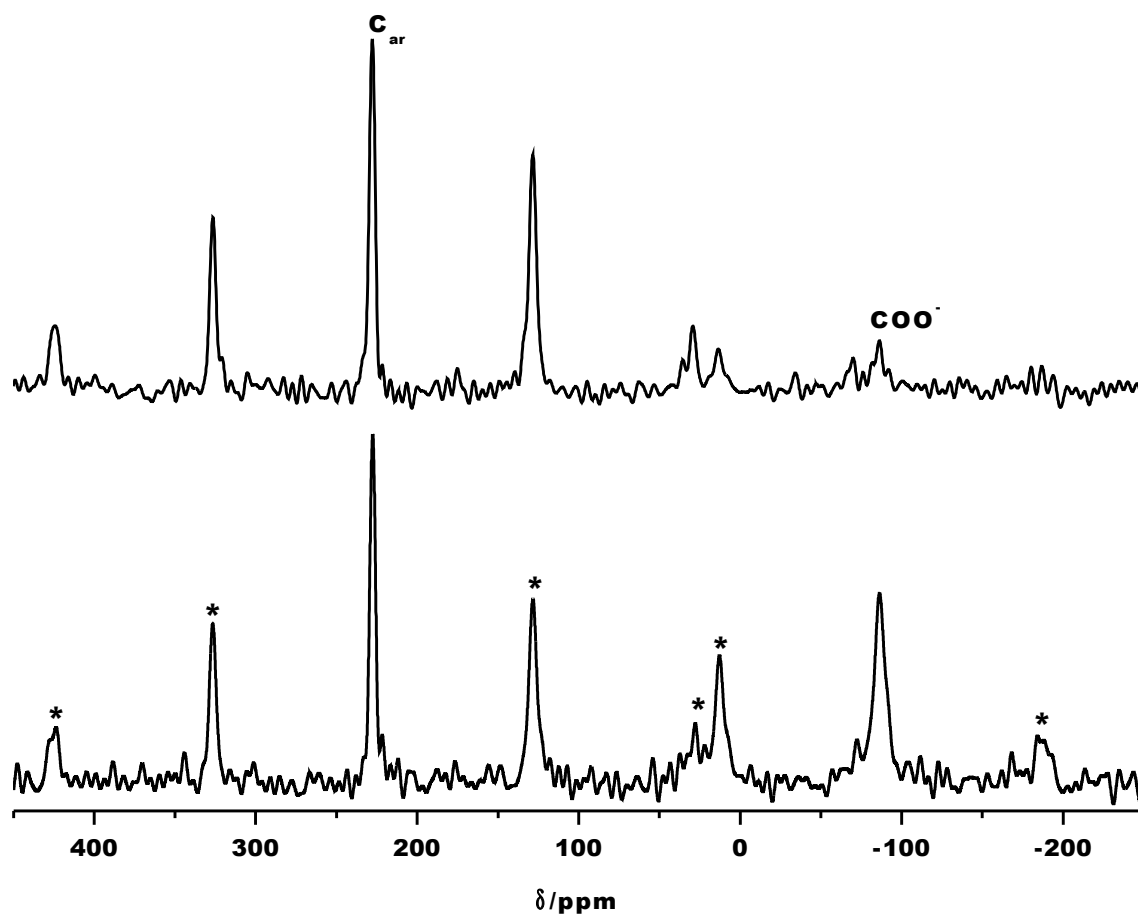

**Figure S-3:**  $^{13}\text{C}$  CPMAS (top) and DPMAS (bottom) spectra of dehydrated  $\text{Cu}_3(\text{BTC})_2$  without high-power proton decoupling. Asterisks (shown only in the lower spectrum) denote spinning sidebands.

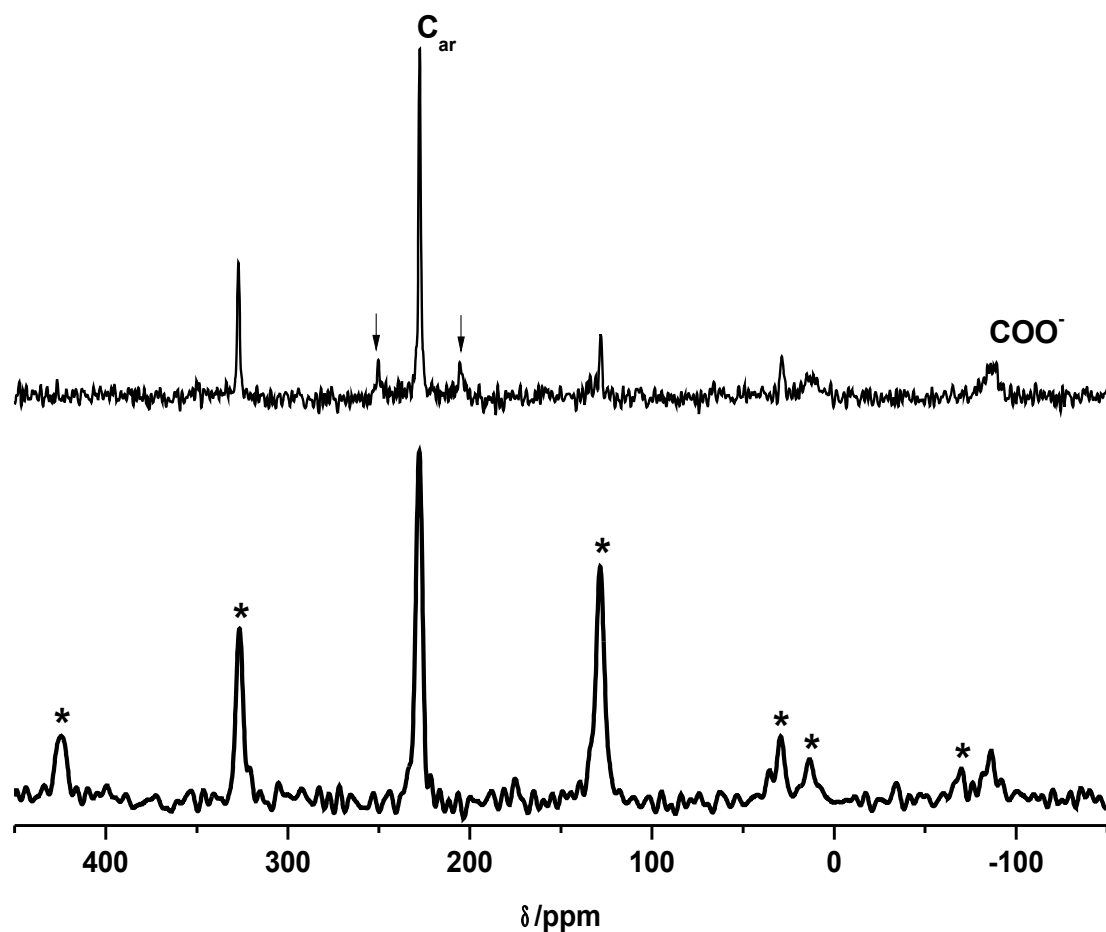

**Figure S-4:**  $^{13}\text{C}$  CPMAS spectra of dehydrated  $\text{Cu}_3(\text{BTC})_2$  with (top) and without (bottom) high-power proton decoupling. Additional signals indicated by arrows are only visible with  $^1\text{H}$  decoupling. Asterisks (shown only in the lower spectrum) denote spinning sidebands.

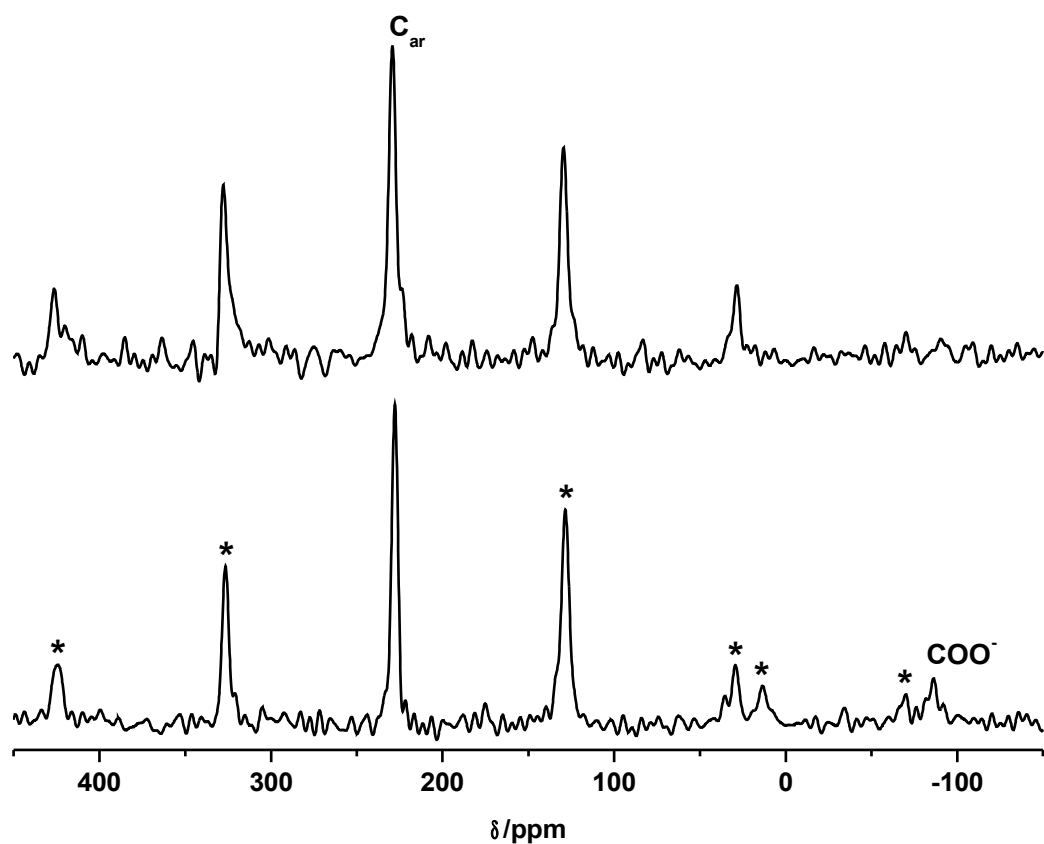

**Figure S-5:**  $^{13}\text{C}$  CPMAS spectra of dehydrated  $\text{Cu}_3(\text{BTC})_2$  with a short contact time of  $50\ \mu\text{s}$  (top) and a long contact time of  $500\ \mu\text{s}$  (bottom). Asterisks (shown only in the lower spectrum) denote spinning sidebands.

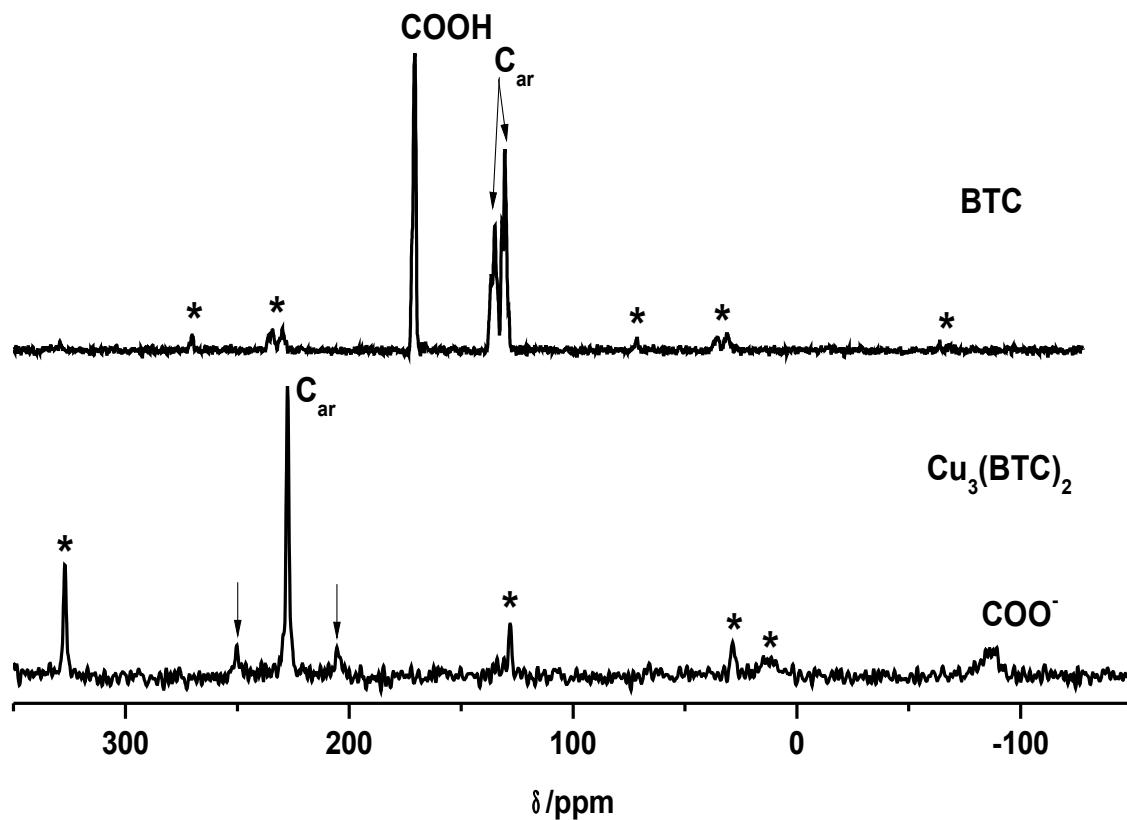

**Figure S-6:**  $^{13}\text{C}$  CPMAS spectra of  $\text{Cu}_3(\text{BTC})_2$  (bottom) and the ligand benzenetricarboxylic acid (top) at 10 kHz rotation frequency with high power proton decoupling. Additional signals indicated by arrows are only visible with  $^1\text{H}$  decoupling. Asterisks denote spinning sidebands.
